# Topography and motion of the acid-sensing ion channel intracellular domains

Tyler Couch<sup>1</sup>, Kyle Berger<sup>2</sup>, Dana L. Kneisley<sup>2</sup>, Tyler W. McCulloch<sup>1</sup>, Paul J. Kammermeier<sup>2</sup> and David M. MacLean<sup>2\*</sup>

<sup>1</sup>Graduate Program in Cellular and Molecular Pharmacology and Physiology

<sup>2</sup>Department of Pharmacology and Physiology, University of Rochester Medical Center

\*To whom correspondence should be addressed

Keywords: ASIC, FRET, gating, patch clamp fluorometry, DPA, fluorescence

# **Abstract**

Acid-sensing ion channels (ASICs) are trimeric cation-selective channels activated by decreases in extracellular pH. The intracellular N and C terminal tails of ASIC1 influence channel gating, trafficking, and signaling in ischemic cell death. Despite several x-ray and cryo-EM structures of the extracellular and transmembrane segments of ASIC1, these important intracellular tails remain unresolved. Here we describe the coarse topography of the cASIC1 intracellular domains determined by FRET, measured using either fluorescent lifetime imaging or patch clamp fluorometry. We find the C terminal tail projects into the cytosol by approximately 35 Å and that the N and proximal segment of the C tail from the same subunits are closer than adjacent subunits. Using pH-insensitive fluorescent proteins, we fail to detect any relative movement between the N and C tails upon extracellular acidification but do observe axial motions of the membrane proximal segments towards the plasma membrane. Taken together, our study furnishes a coarse topographic map of the ASIC intracellular domains while providing directionality and context to intracellular conformational changes induced by extracellular acidification.

# Introduction

The predominant sensor of extracellular pH in the central and peripheral nervous system is thought to be acid-sensing ion channels (ASICs)<sup>1</sup>. This family of trimeric pH-activated sodium-selective ion channels couples extracellular acidification to numerous physiological and pathophysiological consequences including synaptic transmission and plasticity<sup>2-6</sup>, fear memory consolidation and expression<sup>7-10</sup>, epilepsy<sup>11</sup> and ischemia-induced cell death<sup>12,13</sup>. However, in many of these cases the duration of extracellular acidosis is quite long. Since most ASIC subunits desensitize nearly completely in a few seconds<sup>14,15</sup>, how might these channels convey information over minutes or hours? While other extracellular pH sensors may play roles<sup>1,16</sup>, recent evidence reveals that ASICs possess both canonical ionic and non-canonical metabotropic signaling capabilities.

Extracellular acidosis is proposed to drive the association of the serine/threonine kinase receptor interacting protein 1 (RIP1) and N-ethylmaleimide-sensitive factor (NSF) with ASIC1a, triggering RIP1 phosphorylation and initiating a necroptotic signaling cascade<sup>17,18</sup>. This occurs independent of ASIC1a ion conductance and via intracellular protein-protein interactions<sup>17,18</sup>. Thus, ASICs join a growing, and controversial, list of ligand-gated ion channels who also possess metabotropic signaling capacity<sup>19-23</sup>. Like many of these ion channels, the structure of the ASIC extracellular and transmembrane regions have been determined<sup>24-27</sup> but the intracellular domains are unresolved. It is likely that the ASIC intracellular domains (ICDs) are partly, or even mostly, unstructured regions. Nonetheless, understanding the coarse outline of the two ICDs, the N and C tails, as well as their pH-induced movements, would inform further investigation of ASIC

metabotropic signaling and may shed light on how the ICDs impact gating, protein-protein interactions and/or trafficking<sup>28-34</sup>.

Here we set out to generate a coarse topography of the cASIC1 intracellular N and C termini using FRET in several configurations. We find that the short (15 amino acid) N tail projects about 6-10 angstroms from the membrane inner leaflet into the cytosol while the longer 67 amino acid C tail extends between 30 to 40 angstroms. This contrasts with the unresolved tail of AMPA receptors that is largely perpendicular to the membrane<sup>35</sup>. We also report that the N and proximal segment of the C tail from the same subunits are closer than adjacent subunits, suggesting preferential intra-subunit tail interactions which may inform the interpretation of experiments with heteromeric channels. Finally, using pH-insensitive fluorescent proteins, we fail to detect any relative movement between the N and C tails but do observe axial motions of these segments towards the plasma membrane upon extracellular acidification. Together, these data allow us to build a topographical model of the intracellular tails of ASIC1 that will be a foundation for working hypotheses in future experiments.

## Materials and Methods

### *Plasmids and molecular cloning*

A pcDNA3.1(+) vector containing the sequence for codon-optimized chicken ASIC1 (pcDNA3.1-cocASIC1) was used for all experiments<sup>36</sup>. Scar-less insertion of fluorescent protein tags was achieved by opening the pcDNA3.1-cocASIC1 vector by PCR with primers containing 18-nt homologous overhangs. Fluorescent protein sequences were PCR-derived from pmVenus(L68V)-mTurquoise2 (Addgene plasmid #60493), Gamillus/pcDNA3 (Addgene plasmid #124837), or PSD-95-pTagRFP (Addgene #52671), and cloned in using NEBuilder HiFi DNA Assembly Master Mix (New England Biolabs) according to the manufacturer's instructions. These fluorescent protein constructs were gifts from Dorus Gadella, Takeharu Nagai, and Johannes Hell, respectively. All constructs were verified by Sanger sequencing (Eurofins Genomics). The Lck membrane tether clones were made using Lck-mScar-I (Addgene #98821), removing the mScarlet by inverse PCR and inserting PCR derived mTurquoise2 or mVenus. Throughout the manuscript CFP, GFP, YFP and RFP to refer to mTurquoise2, Gamillus, mVenus and TagRFP, respectively.

### *Cell culture and transfection*

A clonal Human Embryonic Kidney 293T (HEK293T) cell line with the endogenous ASIC1 gene knocked out were used for all experiments<sup>37</sup>. HEK293T cells were maintained in Minimum Essential Medium (MEM) containing glutamine and Earle's salts (Gibco) supplemented with 10% fetal bovine serum (Atlas Biologicals) and PenStrep (Gibco). Cells were plated in 35-mm tissue culture treated dishes and transfected 1-2 days later using polyethylenimine 25k (Polysciences, Inc) with a mass ratio of 1:3

(cDNA:PEI). For DPA quenching experiments, 500 ng of pcDNA3.1-cocASIC1 with a fluorescent protein tag and 2.0 µg of pcDNA3.1(+)-empty vector were co-transfected per 35 mm dish. We found that dilution with the empty vector helped limit intracellular accumulation of the channel. Cells were dissociated 24 to 48-hours post-transfection with divalent-free DPBS (Gibco) supplemented with 0.5 mM EDTA and sparsely seeded onto 18 mm No 1 coverslips that had been treated with 100 µg/mL poly-lysine for 20 minutes.

### *Electrophysiology*

Excised patch recordings were done as described previously<sup>36</sup>. Briefly, borosilicate patch pipettes were pulled and heat-polished to a resistance of 3-6 MΩ. The internal pipette solution was (in mM) 135 CsF, 11 EGTA, 10 HEPES, 10 MES, 2 MgCl<sub>2</sub>, 1 CaCl<sub>2</sub>, and pH adjusted to 7.4 using CsOH. External solutions were comprised of (in mM) 150 NaCl, 1 CaCl<sub>2</sub>, 1 MgCl<sub>2</sub>, and either 20 HEPES (pH 8.0) or 20 MES (pH 5.0) and adjusted using NaOH. Data were acquired at 20-50 kHz and filtered online at 10 kHz using AxoGraph software (Axograph), an Axopatch 200B amplifier (Molecular Devices) and USB-6343 DAQ (National Instruments) at room temperature and with a holding potential of -60 mV. Series resistance was routinely compensated by 90-95% when the peak amplitude exceeded 100 pA. A home built double or triple barrel perfusion pipette<sup>38</sup> (Vetrocom) attached to a piezo translator (Physik Instrumente) under computer control was used for fast perfusion. Piezo voltage commands were generally filtered between 50 and 100 Hz.

### *Patch clamp fluorometry*

Coverslips were visualized using a S Fluor 40x oil-immersion objective (N.A. 1.30, Nikon) mounted on a Nikon Ti2 microscope. Transfected cells were excited and visualized with either a 4-channel LED or single channel LED (Thorlabs) and dichroic filter cube.

Single cells were patched in a whole-cell configuration using heat-polished borosilicate glass pipettes with 3-6 MΩ resistance. Cells were continually perfused with external solution, with or without 5 μM dipicrylamine (Biotium), using a homebuilt multi-barrel flow pipe (see above). Single cell fluorescence was collected using a D-104 dual channel photometer (Photon Technology International) attached to the left microscope port. Emitted fluorescence was limited to only the patched cell using adjustable slits and detected with photomultiplier tubes (Hamamatsu Photonics, R12829). Photometers were generally set to a voltage of 650-900 V and filtered with a time constant of 0.5 ms. The photometer voltage signals were fed to the analog inputs of the same DAQ as the patch clamp amplifier and recorded using AxoGraph. The timing of the excitation source was triggered by TTL.

For DPA quenching experiments with CFP, a 455 nm LED, 455/20 nm excitation filter, 442 nm dichroic and 510/84 nm emission filter were used. For YFP, a 505 nm LED, 510/20 excitation filter, 525 dichroic, and 545/35 band-pass emission filter were used. In all cases, we worked to minimize background fluorescence by selecting cells with prominent plasma membrane fluorescence and minimal intracellular signal. Quenching curves were generated in whole cell configuration by a series of 100 ms steps ranging from -180 to + 120 mV in 30 mV increments, with -15 mV holding potential and 1 second between steps. Excitation was triggered 50 ms before a voltage step and lasted for 200 ms. This family of voltage steps was repeated four times either in control, with continual perfusion of 5 μM DPA, or during DPA washes with several seconds separating each condition. We found the data from the first family of DPA steps tended to be inconsistent, presumably reflecting DPA equilibration within the cell. Thus, only the final 3 series of

steps were averaged together. For each recording a background signal was measured by slightly moving the stage to a region with no cells and this signal subtracted. Analysis was done using Clampfit (Molecular Devices) where, following background subtraction, the average fluorescence signal in the second 20 ms window within the voltage step was divided by the fluorescence signal at the preceding holding potential to generate  $F/F_{-15mV}$ . These values for were plotted in OriginLab (OriginLab Corp) and cells were individually fitted with a Boltzmann function. The difference of the minimum and maximum values of the Boltzmann gave the  $\Delta F/F_{-15mv}$  for that specific cell.

For patch clamp FRET experiments, the fluorescence emission was split into two photomultiplier tubes. For CFP/YFP, a 455 nm LED, 455/20 nm excitation, 442 nm dichroic, and 510/84 nm wide-band emission was used. This combination of donor and acceptor emission was passed to the dual photometer, through the adjustable aperture, and split by a 518 nm dichroic before further filtering into nominal donor (482/25 nm) and acceptor (537/26 nm) emission channels. A similar configuration was used for GFP/RFP with 455 nm LED, 470/10 nm excitation, 495 nm dichroic, 500 nm long-pass emission followed by a 552 nm splitter diving donor (510/42 nm) and acceptor (609/54 nm). Single cells were patch clamped and piezo-driven perfusion used to switch between pH 8.0, pH 7 and 6.0 for 2 seconds, with 20 seconds between acidic applications. The excitation source was triggered 1 second before the solution switch for 10 seconds. The background subtracted 'acceptor' channel fluorescence signal was divided by the subtracted 'donor' channel signal to yield an apparent FRET signal. The goal of this experiment was to ascertain if any changes in FRET are detectable upon activation/desensitization of the channel, not to quantify the FRET efficiency. Therefore, we made no attempt to correct



for bleedthrough excitation or emission. To reflect this, all such measurements are referred to as  $\Delta\text{FRET}_{\text{app}}$  or change in apparent FRET.

### *Fluorescence lifetime imaging and confocal imaging*

Fluorescent lifetime imaging (FLIM) was done as described previously<sup>39</sup>. Cells were transfected in either 35mm or 60 mm culture dishes and imaged using a water immersion 25x objective (XL Plan N, 1.05 NA) mounted on an Olympus IX61WI upright microscope. A Mai Tai Sapphire multi-photon laser (Spectra Physics) was used for excitation with an 860 nm wavelength, a repetition rate of 80 MHz and pulse width of ~100 fs. Donor emission was filtered by a 480-20 filter and measured by a H72422P Hamamatsu hybrid avalanche photodiode (APD). Time-correlated single photon counting (TCSPC) was done using a Becker and Hickl card with a resolution of 25 ps. Using VistaVision software (ISS), donor fluorescence from the plasma membrane from individual cells was binned and fit with a single exponential function, consistent with the lifetime of CFP variant mTurquoise2<sup>40</sup>.

For confocal imaging, cells were transfected with Lck-CFP or CFP-tagged cASIC1 in 35 mm dishes. After two days, cells were stained with 2 mL of 7.5  $\mu\text{M}$  FM1-43 (Invitrogen) immediately prior to imaging with an Olympus FV1000MP microscope using a 60x water immersion objective (U Plan SApo, 1.20 NA). CFP and FM1-43 were simultaneously excited with a 440 nm laser and emissions between 465-495 nm collected as CFP and 575-675 nm collected as FM1-43.

### *DPA quenching simulations*

Closely following the work of Wang<sup>41</sup> and Zachariassen<sup>35</sup>, we calculated the FRET between a donor fluorophore and a plane of DPA molecules over a range of axial

distances. The donor fluorophore was positioned at a distance,  $R_a$ , from a point within a perpendicular plane representing the inner leaflet of the plasma membrane. This point is the center of a ring of radius  $r$ , within the perpendicular plane. The distance between the donor and DPA on the perimeter of the ring is the hypotenuse of a triangle with the other sides being the ring radius,  $r$ , and the axial distance between the center of the ring and the donor,  $R_a$ . Thus the donor-acceptor distance is  $\sqrt{R_a^2 + r^2}$ . We define  $P(r)$  as the probability that no FRET will occur between the donor and DPA positioned along ring perimeter and  $Q(r)$  as the probability FRET (quenching) will occur. As the sum of  $P(r)$  and  $Q(r)$  is one, for a ring of slightly larger radius  $r + dr$

$$P(r + dr) = P(r)(1 - Q(r)dr)$$

FRET efficiency,  $E$ , over a distance,  $d$ , for a single donor-acceptor pair is given by

$$E = \frac{1}{1 + \left(d/R_0\right)^6}$$

Where  $R_0$  is the Förster distance giving half-maximal FRET. As with past work, we used 5  $\mu\text{M}$  DPA which gives a density,  $\sigma$ , of  $1.25 \times 10^{-4}$  molecules per  $\text{\AA}^{-2}$ <sup>41</sup>. Combining the DPA density and distance constraint we define the probability of quenching as

$$Q(r)dr = \frac{\sigma 2\pi r dr}{1 + \left(\frac{R_a^2 + r^2}{R_0^2}\right)^3}$$

Given equation 1, the following differential equation can be derived:

$$\frac{dP}{dr} = \frac{\sigma 2\pi r P}{1 + \left(\frac{R_a^2 + r^2}{R_0^2}\right)^3}$$

Substituting  $u = (R_a^2 + r^2)/R_0^2$  and evaluating the integral at  $r = \infty$  gives:

$$P_{\infty} = \exp\left(-\sigma\pi R_0^2 \int_{\frac{R_a^2}{R_0^2}}^{\infty} \frac{du}{1+u^3}\right)$$

Which represents the unquenched fluorescence signal remaining over a range of axial distances. As DPA is assumed to traverse about 25 Å in the plasma membrane<sup>35,41</sup>, evaluating this integral using either  $R_a$  or  $R_a + 25$  gives the quenching curves for DPA at the inner leaflet or outer leaflet, which are populated by infinitely depolarizing or hyperpolarizing conditions, respectively.  $R_0$  calculations were done with the  $k^2 = 2/3$  assumption, using donor fluorescent protein (FP) spectra and quantum yield listed in FP database<sup>42</sup>. The DPA absorption spectrum was measured with 25 μM DPA diluted in saline on a QuickDrop spectrophotometer (Molecular Devices). The DPA molar extinction coefficient was determined to be 26,500 M<sup>-1</sup>cm<sup>-1</sup> by fitting the slope of absorption measurements from serial dilutions of DPA into saline or 1% SDS. This value is consistent with previously reported measurements<sup>43</sup>.

### Statistics and Data Analysis

Current desensitization decays were fitted using exponential decay functions in Clampfit (Molecular Devices). For recovery from desensitization experiments, the test peak (i.e., the second response) was normalized to the conditioning peak (i.e., the first response). OriginLab (OriginLab Corp) was used to fit the normalized responses to:

$$I_t = \left(1 - e^{(-t/\tau)}\right)^m \quad \text{Eq. 1}$$

Where  $I_t$  is the fraction of the test peak at an interpulse interval of  $t$  compared to the conditioning peak,  $\tau$  is the time constant of recovery and  $m$  is the slope of the recovery curve. Patches were individually fit and averages for the fits were reported in the text. N was taken to be a single patch.

195 FRET efficiency from FLIM measurements was calculated using:

196 
$$FRET_{efficiency} = 1 - \left( \tau_{donor+acceptor} / \tau_{donor\ only} \right)$$

197 Where  $\tau_{donor\ only}$  and  $\tau_{donor+acceptor}$  are the single exponential time constants of donor decay  
198 in the absence and presence of acceptor, respectively.

199 Unless otherwise noted, statistical testing was done using nonparametric  
200 permutation or randomization tests with at least 100,000 iterations implemented in Python  
201 to assess statistical significance.

## Results

### *Voltage-dependent quenching measurements with DPA*

The intracellular components of the cASIC1 N and C terminal tails are 15 and 67 amino acids, respectively. The range of possible structures adoptable by these tails is quite large. For example, in principle the C tail could exist as a linear strand of peptide more than 70 Å long<sup>44</sup> extended parallel to the plasma membrane or as a similar extended strand but perpendicular to the membrane plane, projecting 'downward' into the cytosol. These two extreme scenarios represent the borders of the conformational landscape. The main goal of our study was to experimentally shrink the range of possibilities and map this landscape. Our secondary goal was to determine if these intracellular domains move upon extracellular acidification. To do this, we adopted a FRET approach using different colored fluorescent proteins as donors and the membrane soluble small molecule DPA as an acceptor (Figure 1A). DPA has several advantageous properties as a FRET acceptor<sup>41,45</sup>. First, it is a dark acceptor, allowing FRET to be easily measured by changes in donor emission. Second, it binds and dissociates from the plasma membrane quickly with respect to the time of a patch clamp experiment. Third, and most critically, the anionic DPA orients in the plasma membrane depending on voltage, being pulled into the inner membrane leaflet by depolarization or pushed to the outer leaflet by hyperpolarization. Thus, voltage steps can move DPA molecules closer to, or further from, the donor by a fixed distance of 25 Å, reflecting to the estimated displacement of DPA<sup>35,41</sup>. These qualities have been used to probe topography and conformational changes in several ion channels from multiple groups<sup>46-50</sup>. We validated this approach using patch clamp fluorometry where the fluorescence from single patch clamped cells, transfected with membrane tethered CFP or YFP variants (mTurquoise2 and mVenus), was recorded in the continual presence of

DPA during a series of voltage steps (-180 mV to +120 mV, 20 mV increments, Figure 1B). Membrane tethered CFP (Lck-CFP) gave robust voltage-dependent fluorescence changes in the presence of DPA (5  $\mu$ M) but not in its absence ( $\Delta F/F_{-15 \text{ mV}} = 0.45 \pm 0.03$ ,  $n = 6$ , Figure 1C & D), consistent with the fluorophore being close to the plasma membrane and having a relatively high  $R_0$  distance (47 Å). The Lck-YFP gave relatively weak voltage-dependent quenching in the presence of DPA ( $\Delta F/F_{-15 \text{ mV}} = 0.16 \pm 0.013$ ,  $n = 6$ , Figure 1C & D), which is also consistent with a membrane proximal position but relatively lower  $R_0$  distance (36.5 Å).

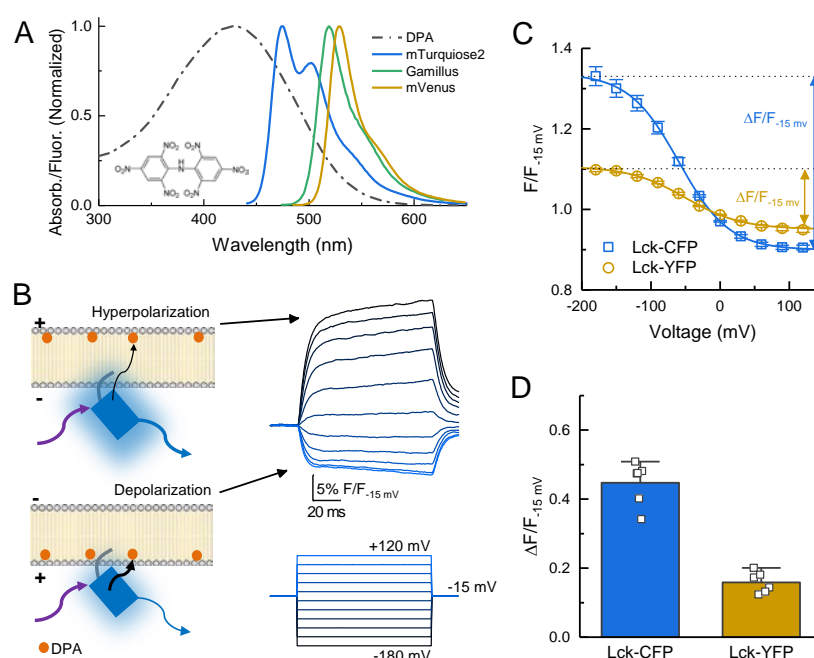

**Figure 1: Schematic of DPA quenching measurements. (A)** Absorption (dotted line) or fluorescence emission (solid lines) spectra of DPA (black), CFP variant mTurquoise2 (blue), GFP variant Gamillus (green) and YFP variant mVenus (yellow). Structure of DPA inset. **(B, left)** DPA (orange circle) localizes to the outer leaflet with hyperpolarization and moves to inner leaflet upon depolarization, resulting in stronger quenching. Arrows reflect excitation (purple), emission (blue) or resonance transfer (black). **(B, right)** Exemplar patch fluorometry data of Lck-CFP fluorescence changing during voltage steps. **(C)** Single cell fluorescence, normalized to fluorescence at -15 mV, over a range of voltages for Lck-CFP (blue) and Lck-YFP (yellow). Solid lines are fits to Boltzmann function which yield  $\Delta F/F$ . **(D)** Summary of  $\Delta F/F$ s from Lck-CFP or Lck-YFP. Squares are single cells ( $N = 6$  cells per construct) and error bars depict SEM.

244           Next, we set out to generate a coarse topographical map of chicken ASIC1 using DPA  
 245 quenching. To do this, we relied upon the steeply non-linear distance dependence of FRET. For  
 246 example, if DPA is close to a donor fluorophore then inducing a 25 Å displacement away using  
 247 voltage steps will produce a large change in fluorescence whereas if DPA is far from a donor  
 248 then a 25 Å displacement away will yield a much smaller effect (Supplemental Figure 1). We  
 249 inserted CFP or YFP immediately upstream of the N terminus and into four positions within the  
 250 C tail (Figure 2A, Supplemental Figure 2). The C tail positions were selected based on prior  
 251 divisions within this domain<sup>17,18</sup>. If the C tail is roughly parallel to the plasma membrane, as  
 252 observed for AMPA receptors<sup>35</sup>, then all insertions will have equal voltage-dependent  
 253 quenching. However, if quenching varies at different insertion points and between fluorophores,  
 254 these data will provide insight into the topography of the tail. Importantly, fluorescent protein (FP)  
 255 insertions did not disrupt channel function as determined by the rates of desensitization and  
 256 recovery, although small differences in desensitization decay of C4 and recovery of C1 insertions  
 257 appeared (Supplemental Figure 3). Further, these constructs showed robust plasma membrane  
 258 localization in confocal microscopy (Supplemental Figure 4). For each construct, we measured  
 259 the fluorescence emission from single voltage clamped cells over a range of voltage steps before  
 260 DPA application, during continual application of 5 μM DPA and during a subsequent wash  
 261 period. Figure 2 shows the results of these experiments with extracellular pH 8 to maximally  
 262 populate the resting state. Importantly, the extent of quenching varied by position, ruling out the  
 263 possibility that the C tail is parallel to the membrane. Specifically, we found that with CFP  
 264 insertions, the C1 position gave the strongest quenching ( $\Delta F/F_{-15 \text{ mV}} = 0.65 \pm 0.03$ ) with N and  
 265 C2 being about equal ( $\Delta F/F_{-15 \text{ mV}} = 0.48 \pm 0.03$  and  $\Delta F/F_{-15 \text{ mV}} = 0.51 \pm 0.05$ ) and C3 and C4  
 266 having progressively less quenching ( $\Delta F/F_{-15 \text{ mV}} = 0.39 \pm 0.03$  and  $\Delta F/F_{-15 \text{ mV}} = 0.21 \pm 0.03$ ). In

the case of YFP, a slightly different pattern was observed where the N terminal YFP gave the strongest quenching ( $\Delta F/F_{-15 \text{ mV}} = 0.26 \pm 0.02$ ) with C1-C4 giving progressively weaker quenching ( $\Delta F/F_{-15 \text{ mV}}$  between  $0.23 \pm 0.02$  and  $0.14 \pm 0.01$ , Figure 2B-D).

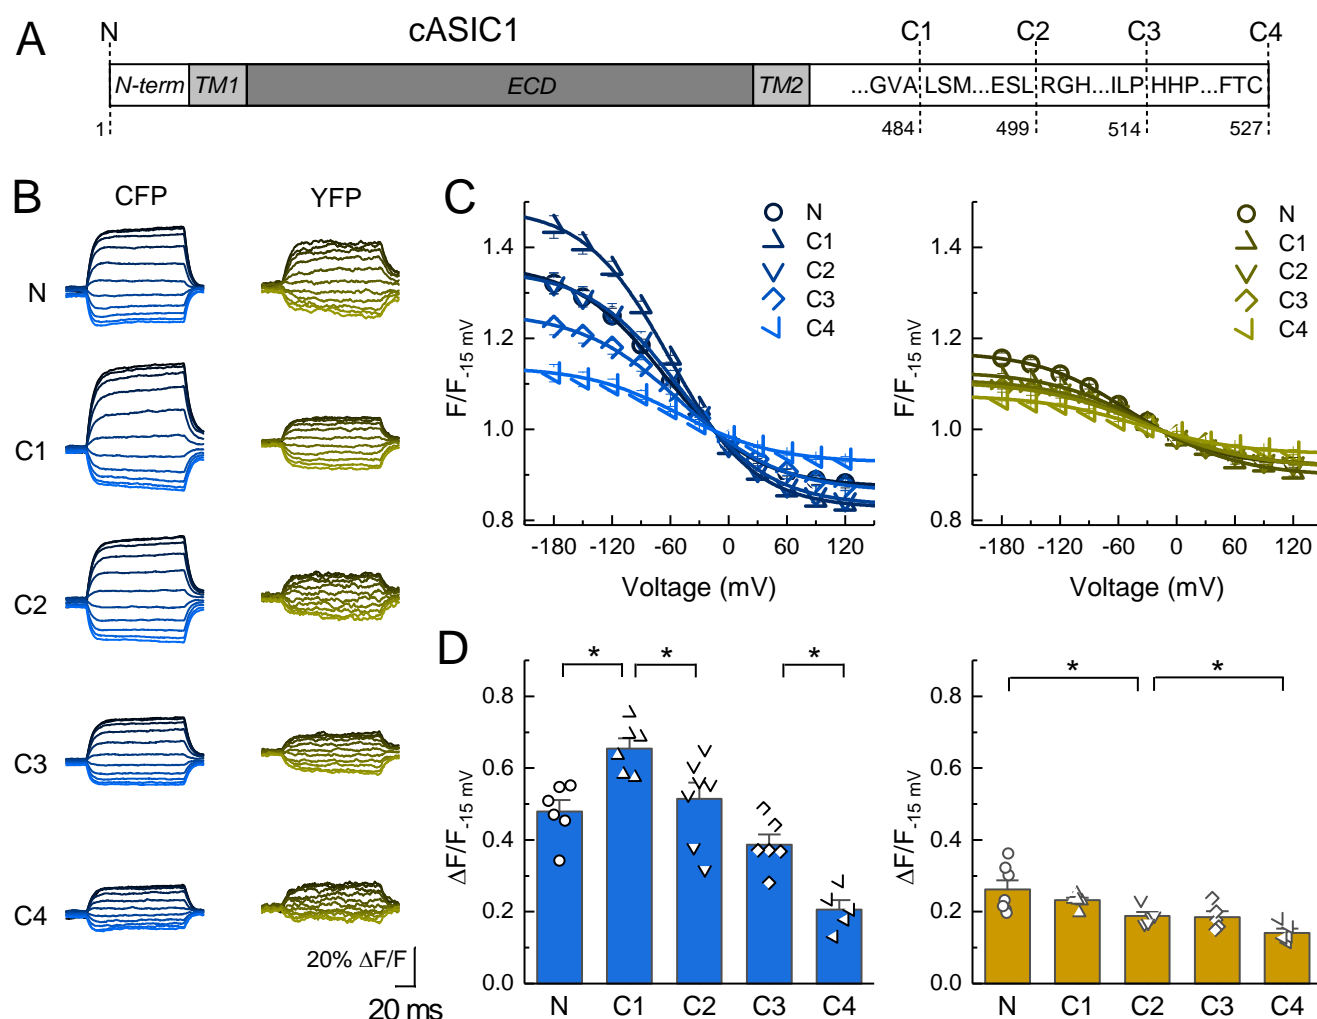

**Figure 2: DPA quenching of CFP or YFP insertions in cASIC1 intracellular domains. (A)** Schematic of cASIC1 constructs used. The extracellular domain (ECD) and transmembrane helices (TM) are grey with amino and carboxy termini depicted in white. Letters within the carboxy tail indicate the amino acid sequence around the insertion site while the lower numbers give the position. **(B)** Example fluorescence traces for each of the CFP or YFP insertions. Voltage protocol and coloring is the same as in Figure 1B. **(C & D)** Quenching curves and summary plots for CFP (left) and YFP (right) insertions. Symbols denote individual cells (N = 6 - 7 cells) and error bars represent SEM. Asterisks mark significant differences with p values of 0.00095 (N-C1), 0.024 (C1-C2), 0.00528 (C3-C4) for CFP and 0.038 (N-C2), 0.029 (C2-C4) for YFP.



271 To gain further insight from these data, we modelled DPA quenching of CFP and YFP  
 272 using previously established theory<sup>35,41</sup> (Supplemental Figure 5). The expected quenching of  
 273 CFP and YFP was simulated at infinitely negative and positive voltages over a range of distances  
 274 from the plasma membrane (Supplemental Figure 5A and B). Subtracting these curves and  
 275 normalizing produces the theoretical  $\Delta F/F_{\text{norm}}$  curves as a function of distance for both CFP and  
 276 YFP (Supplemental Figure 5C). The CFP curve has a distinct hump at 24 Å (ie. 20 and 28 Å  
 277 give equal extents of quenching) while the YFP curve peaks at 16 Å and falls off with increasing  
 278 distance (Supplemental Figure 5C). This broadly mirrors the quenching pattern we observe in  
 279 our data with CFP C1 giving the greatest quenching followed by N and C2 then C3 and C4 while  
 280 in YFP all positions are weaker than N (Supplemental Figure 5C). The most parsimonious  
 281 interpretation of these data is that the N terminal insertion point is membrane proximal while all  
 282 positions in the C tail are progressively further from the membrane. To assign some provisional  
 283 distances to these measurements, we assumed the FP adds 10 angstroms to the axial distance,  
 284 reflecting the radius of the beta barrel. With this assumption, the strongest interpretation of our  
 285 data is that the tip of the N terminus is about 6-10 angstroms from the inner leaflet while the C1  
 286 insertion site is approximately 12-16 angstroms away. Distance estimates for the C2-C4  
 287 insertion sites are difficult to assign however given that the C4 position shows quenching for  
 288 both FPs, this final C terminal amino acids are likely within 30 to 40 angstroms of the inner leaflet.  
 289 For reference, the C-α to C-α distance from the critical His74 to Lys355, at the base of thumb  
 290 domain's alpha5 helix, is 35 angstroms (resting state, PDB:6VTL). Uncertainties and caveats to  
 291 these estimates are enumerated in the Discussion section. Increases in accuracy to this  
 292 provisional map will require reductions in background fluorescence and a smaller fluorophore at  
 293 more positions.

## 294 *N and C tail inter versus intra subunit interactions*

295       The DPA quenching experiments indicate the N terminal insertion is closest to the plasma  
 296 membrane, while the C1-C4 insertions are progressively further away. Within the membrane  
 297 proximal segment of the C tail is a cluster of lysine and arginine residues (amino acids 461 –  
 298 476). These have been proposed to interact with a segment of negatively charged amino acids  
 299 in the N termini (amino acids 7-12), forming a salt bridge between the intracellular tails of the  
 300 same subunit<sup>17,18</sup>. We reasoned that if such a bridge was formed between tails of the same  
 301 subunit, then FPs appended to both tails of the same subunit would experience stronger FRET  
 302 than FPs on the tails of different subunits. To test this, we used fluorescent lifetime imaging  
 303 (FLIM) to measure the lifetime of an N terminal CFP donor in the absence or presence of a C  
 304 terminal YFP acceptor. A challenge in this experiment is ensuring that only one FRET pair exists  
 305 within the majority of trimers. If more than one pair of FPs are present, a ‘donor-centric’ measure  
 306 of FRET like FLIM will be skewed towards higher FRET efficiencies<sup>51</sup>. To measure the FRET  
 307 between CFP and YFP in a single subunit we appended a C terminal YFP to the N terminal CFP  
 308 clone (CFP-cA1-YFP, Supplemental Figure 2). This construct was transfected along with wild  
 309 type cASIC1 at progressively increasing ratios. In principle, as the amount of unlabeled wild type  
 310 cASIC1 increases, the FRET should decrease (lifetimes increase) until a plateau is reached.  
 311 The FRET value of this plateau will correspond to the FRET from single subunits. As expected,  
 312 CFP-cA1-YFP alone produced very strong FRET as evidenced by the dramatically faster CFP  
 313 lifetimes compared to N CFP (N CFP:  $4.06 \pm 0.02$  ns,  $n = 76$ ; CFP-cA1-YFP:  $2.68 \pm 0.03$ ,  $n =$   
 314 58, Figure 3). Adding more wild type cASIC1 led to an increase in CFP lifetimes until reaching a  
 315 plateau of approximately 3 ns, representing a FRET efficiency of 25% between CFP and YFP in  
 316 a single subunit (1:31 ratio:  $3.08 \pm 0.03$ ,  $n = 34$ , 24% FRET efficiency, Figure 3C).

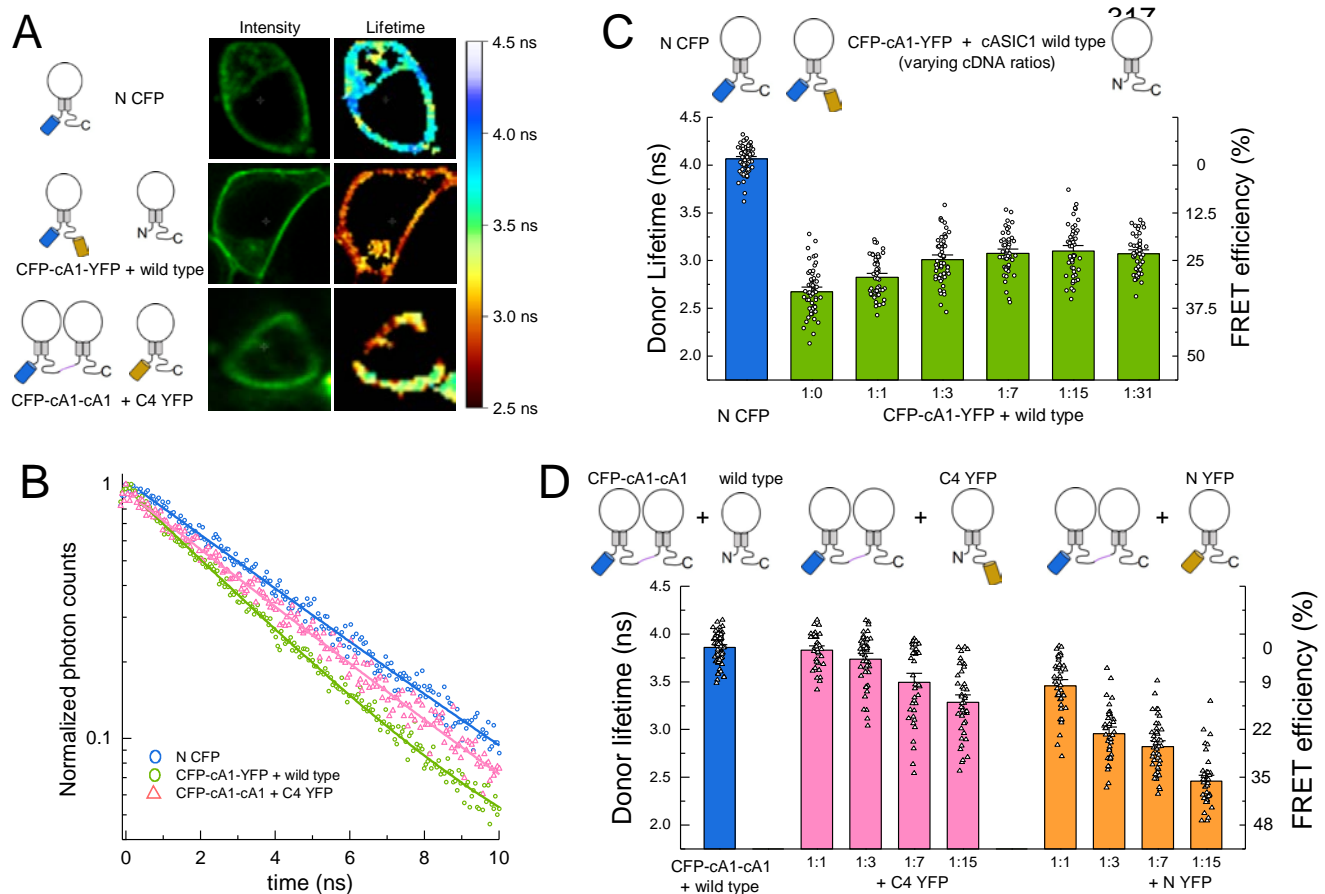

**Figure 3: FRET is stronger within subunits than between subunits (A)** Example cells transfected with the indicated constructs showing intensity (*left*) and lifetime (*right*) images. **(B)** TCSPC histograms from the plasma membrane of cells in A and additional control. Solid line is a single exponential fit to the data. **(C)** Cartoon (*upper*) and lifetimes (*lower*) from the indicated constructs for measuring intra-subunit FRET. **(D)** Cartoon (*upper*) and lifetimes (*lower*) for measuring inter subunit FRET. Symbols denote single cells (N = 35 – 76 cells) and error bars are SEM.

To measure the FRET between FPs in different subunits, we concatenated two cASIC1 subunits together in a dimer with an N terminal CFP (CFP-cA1-cA1, Supplemental Figure 2). Expression of this clone along with wild type cASIC1 gave the expected ~ 4 ns mono-exponential lifetime from this CFP variant ( $3.86 \pm 0.02$  ns, n = 74). Co-transfection of CFP-cA1-cA1 along with C4 YFP at increasing ratios produced progressively faster lifetimes up to about 3.3 ns or 15% FRET efficiency (1:15:  $3.28 \pm 0.05$  ns, n = 43, Figure 3). In this experiment, FRET comes partly from the CFP-cA1-cA1 transferring energy to a YFP within the channel complex and partly

from transfer to YFPs in nearby ASICs (ie. crowding). This crowding effect is illustrated in Supplemental Figure 6 where CFP-cA1-cA1 is co-expressed with unlabeled wild type and Lck-YFP at varying ratios. As the Lck-YFP amount is increased so does the FRET efficiency. Separating out the fraction of FRET due to crowding is difficult but also unnecessary in this case. Even with a 1:15 ratio of CFP-cA1-cA1 to C4 YFP, where all dimers likely have a C4 YFP monomer partner, the FRET efficiency is significantly less than that observed in the CFP-cA1-YFP experiment ( $15 \pm 1\%$ ,  $n = 43$  for CFP-cA1-cA1 + C4 YFP 1:15;  $24 \pm 1\%$ ,  $n = 46$  for CFP-cA1-YFP + wild type 1:15,  $p < 1e-6$ , student's t-test). Thus, FPs on the same subunit show more efficient FRET than on different subunits, suggesting the tails of the same subunit are physically closer and more likely to associate.

The addition of C4 YFP at 1:1 and 1:3 ratios gave unexpectedly small FRET efficiencies ( $1 \pm 1\%$  and  $3 \pm 1\%$ ,  $n = 35$  and  $46$ ). To determine if the concatenated dimer was assembling as anticipated, we repeated the experiment using N YFP, where the acceptor is positioned much closer to the donor and hence should give more robust FRET. Consistent with this, all ratios of N YFP gave a strong reduction in donor lifetimes, indicating the CFP dimer does assemble with labelled monomer. Taken together, these experiments demonstrate that FRET efficiency from FPs on neighboring subunits is considerably less than that measured from the same subunit, supporting a model where the N and C tails of the same subunit interact.

### *Measurement of intracellular domain conformational changes*

The putative salt bridge between the N terminal tail and the membrane proximal segment of the C tail is proposed to break apart to facilitate ion-independent signaling<sup>17</sup>. Evidence for this movement comes from the change in FRET between N terminal CFP and C terminal YFP upon extracellular acidification<sup>17</sup>. To investigate this, we conducted an analogous experiment using

patch clamp fluorometry with simultaneous recording of both the blue and yellow emission from CFP-cA1-YFP receptors. As seen in Figure 4A and B, rapid application of pH 7 or 6, but not pH 8, produced a decrease in the ratio of YFP to CFP emission (ie. apparent FRET) with a slow time course ( $\Delta\text{FRET}_{\text{app}}$  pH 7:  $-2.6 \pm 0.3\%$ ,  $n = 8$ ,  $p = 0.006$  versus pH 8; pH 6:  $-4.6 \pm 0.5\%$ ,  $n = 8$ ,  $p = 0.0004$  versus pH 8). However, as discussed previously<sup>17</sup>, the strong pH sensitivity of YFP complicates the interpretation of these measurements. Consistent with this<sup>17</sup>, we also observed a strong loss of emission from C4 YFP upon extracellular acidification (Figure 4A and B,  $\Delta F_{\text{norm}}$  pH 7:  $-2.6 \pm 0.8\%$ ,  $n = 5$ ; pH 6:  $-12 \pm 2\%$ ,  $n = 8$ ). In contrast, the N CFP showed no such change in emission (Figure 4) owing to this CFP variants pKa of 3.1<sup>40</sup>.

Blue/yellow and green/red pairings are the most common for FRET. The chromophore of GFP is intrinsically pH sensitive and because YFP is a derivative of GFP, pH sensitivity will always be a concern for these FPs. Fortunately, a novel GFP was described with a distinct chromophore and pKa of 3.4<sup>52</sup>. When combined with a relatively low pKa red fluorescent protein (TagRFP, pKa 3.8<sup>53</sup>), this pairing should enable a FRET measurement that is relatively insensitive to the pH range examined while gaining the advantages of green/red FRET<sup>39</sup>. We therefore cloned the low pKa GFP into the N terminal position and the RFP into the C4 position (GFP-cA1 and cA1-RFP, Supplemental Figure 2) and tested the pH sensitivity of their fluorescence emission. As seen in Figure 4C and D, both clones showed no change in their fluorescence emission with extracellular pH 6, 7 or 8, confirming their suitability for measuring conformational changes induced by pH. We next added both FPs into a single subunit (GFP-cA1-RFP) and repeated our dual channel patch clamp fluorometry measurements. However, we detected no change in apparent FRET between these FPs (Figure 4C and D, numbers). Importantly, the GFP does FRET with the RFP as the ratio of red to green fluorescence emission

was significantly greater in the GFP-cA1-RFP clone compared to the GFP-cA1 only (GFP-cA1:  $0.14 \pm 0.01$ ,  $n = 6$ ; GFP-cA1-RFP:  $0.41 \pm 0.04$ ,  $n = 7$ ,  $p = 0.0007$ ). To increase the sensitivity to local motions, we repeated the experiment with the RFP cloned into the C1 position (ie. GFP-cA1-C1-RFP). Unfortunately, here again we did not detect any change in apparent FRET with either GFP-cA1-C1-RFP alone or when diluting this construct out with unlabeled wild type cASIC1 ( $\Delta FRET_{app}$  GFP-cA1-C1-RFP pH 6:  $-0.9 \pm 1.4\%$ ,  $n = 3$ ; + wild type pH 6:  $-0.8 \pm 1.5\%$ ,  $n = 5$ ; Supplemental Figure 7). Although we did not detect any changes in FRET, we cannot exclude that extracellular acidification does cause the N and C tails do move apart laterally but such movements are either small, localized or otherwise fall below our ability to detect them.

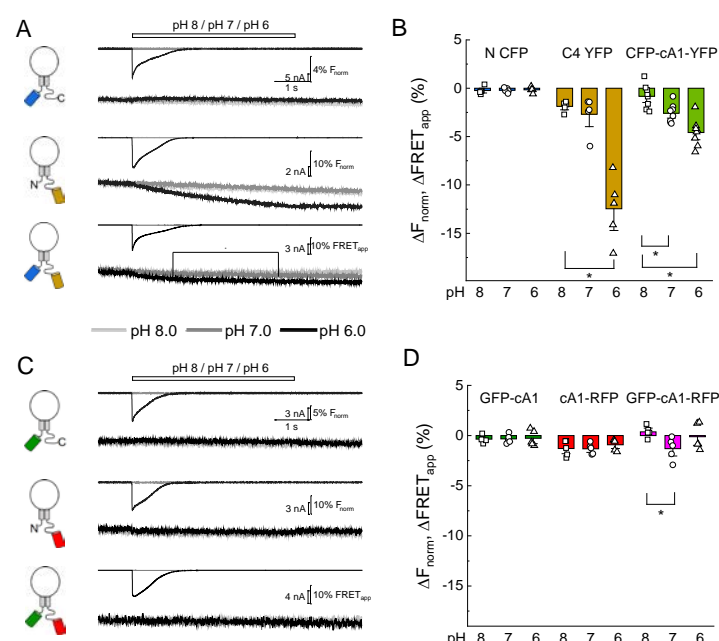

**Figure 4: Extracellular acidification produces no change in FRET when using pH-insensitive FPs.** (A) Cartoons (left), electrophysiology (upper) and fluorescence traces (lower) from single cells transfected with the CFP, YFP or both FPs attached to cASIC1 during pH jumps from 8 into pH 8, pH 7 or pH 6. Fluorescence trace is the acceptor fluorescence signal divided by the donor. (B) Summary of change in acceptor/donor ratio during pH changes. (C) Same as in A but for pH-insensitive variants of GFP and RFP (see Methods). (D) Summary of change in acceptor/donor ratio during pH changes. Symbols indicate single cells ( $N = 5 - 8$  cells), error bars are SEM.

Finally, we investigated if either the N or C tails move axially, with respect to the plasma membrane, upon extracellular acidification. To do this, we returned to DPA quenching by first recording the fluorescence emission during a series of voltage steps in the absence of DPA, presence of DPA at pH 8.0 and then in the presence of DPA at pH 6.0. Importantly, the voltage dependent quenching of Lck-CFP was not different between extracellular pH 8 compared to pH 6 ( $\Delta F/F_{-15 \text{ mV}}$  pH 8:  $0.45 \pm 0.03$ , pH 6:  $0.43 \pm 0.04$ ,  $n = 6$ ,  $p = 0.52$ , paired t-test, Figure 5), thus confirming the DPA quenching is relatively pH-tolerant. Interestingly, the extent of quenching at the N and C1 position was significantly reduced in pH 6 compared to pH 8 (Figure 5). Specifically, in the resting state (pH 8), CFP at the N or C1 position had a  $\Delta F/F_{-15 \text{ mV}}$  of  $0.49 \pm 0.02$  or  $0.57 \pm 0.04$  ( $n = 13$  or  $11$ ), respectively. However, with extracellular pH 6 (populating the desensitized state), these were reduced to  $0.41 \pm 0.02$  and  $0.55 \pm 0.03$ . In a subset of cells expressing the N CFP clone, we maintained the recording in pH 8, 6 and then back to pH 8 and found the effect on the extent of quenching was readily reversible (Supplemental Figure 8). None of the other positions showed significant evidence of movement between these conditions (Figure 4B-C), supporting that this motion is specific to the membrane proximal region and not a general pH artefact. These results demonstrate that both the N and C tails of cASIC1 moves axially with respect to the membrane between the resting and desensitized states. To determine if the axial motion is toward or away from the plasma membrane, we considered our prior data and theoretical analysis (Figure 2, Supplemental Figure 5). The resting state DPA quenching place the N terminal FP chromophore about 15-20 angstroms from the inner membrane leaflet (Figure 2, Supplemental Figure 5). The reduced quenching in the pH 6 condition indicates the FP moves even closer to the plasma membrane upon channel desensitization. However, interpreting the C1 data is less straightforward. The DPA data indicate FPs at the C1 position are about 23-25



angstroms from the inner leaflet, thus lying at or near the peak of CFP's  $\Delta F/F_{\text{norm}}$  curve (Supplemental Figure 5C and D). In such a position, moving either towards or away from the plasma membrane will result in decreased quenching. A scenario where the N terminal moves towards the membrane while the C tail moves away is difficult to reconcile with the lack of  $\Delta FRET$  between FPs in these positions upon acidification (Figure 4). Therefore, our data favor a model where the N and proximal segment of the C tail move up towards the inner membrane leaflet when the channel is exposed to desensitizing conditions (Figure 6).

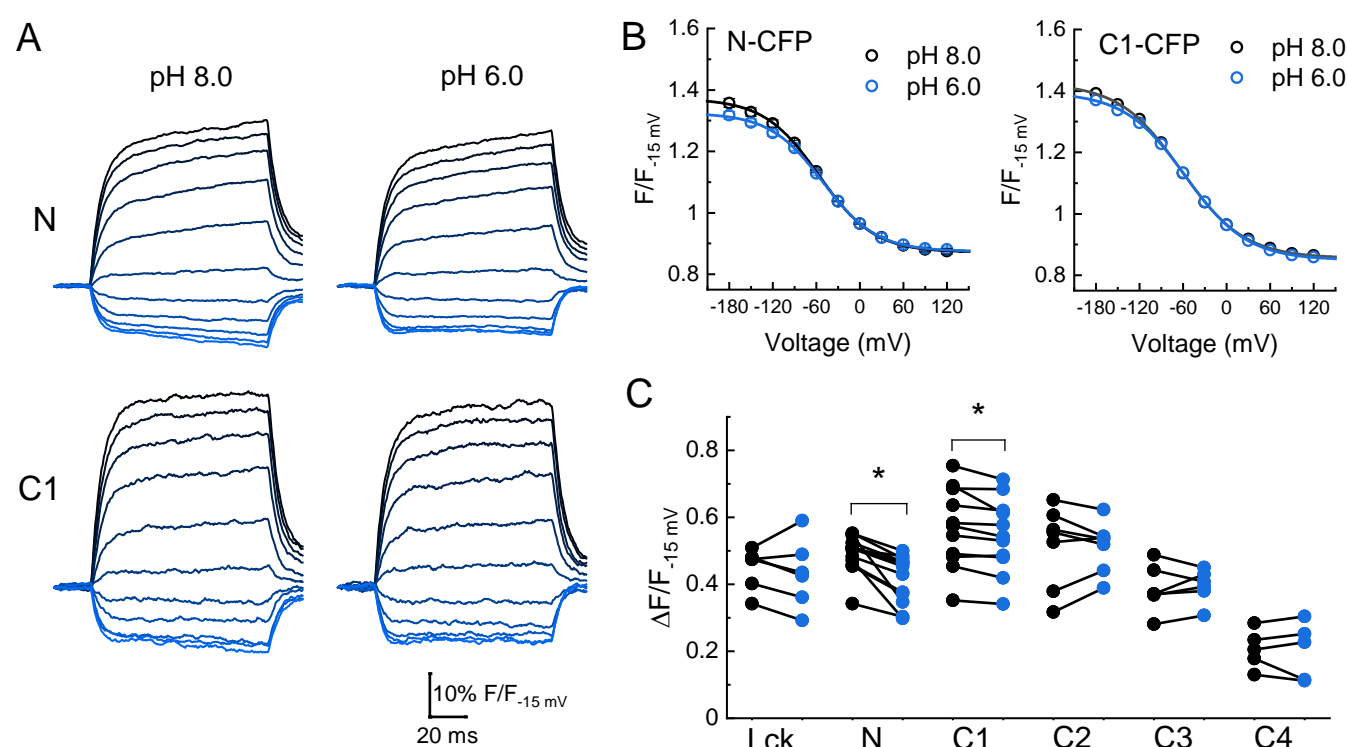

**Figure 5: Desensitization induces an axial motion of the membrane proximal region. (A)** Example CFP fluorescence quenching traces from single cells expressing N or C1 CFP-cASIC1 with extracellular pH 8 (*left*) or pH 6 (*right*). **(B)** Quenching voltage curves for CFP inserted in N (*left*) or C1 (*right*) position. Curves in extracellular pH 8.0 (resting state) shown in black and pH 6.0 (desensitized) in blue. **(C)** Summary of the extents of quenching at each position with extracellular pH 8 (*black*) and 6 (*blue*). Symbols denote individual cells (N = 5 – 13 cells per construct) and error bars represent SEM. \* indicates p value < 0.05 by Wilcoxon rank sum test.



411

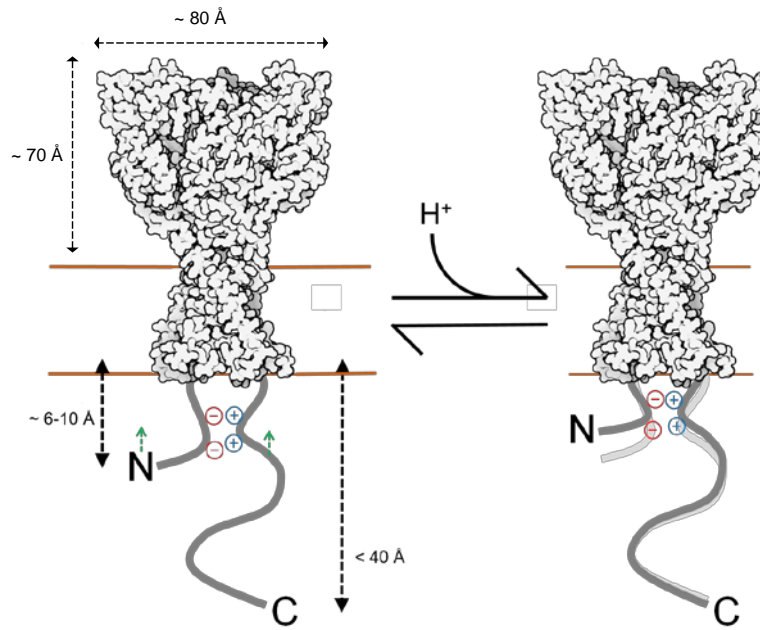

**Figure 6: Cartoon of topography and acid-induced motions for cASIC1.** Estimated distances of N and C tail positions derived from DPA quenching mapped onto resting state structure (6VTL). Not drawn to scale. Extracellular pH moves the proximal N and C segments towards the membrane.

## Discussion and Conclusion

Using a combination of patch clamp fluorometry and FLIM, we obtained an outline of the ASIC intracellular domains. We find the N terminus and proximal segment of the C terminus to extend about 6-10 and 12-16 angstroms into the cytosol, while the remainder of the C tail projects not more than 40 angstroms. Further, FLIM FRET results indicate the N and proximal segment of the C tail from the same subunit are physically closer than from different subunits, presumably reflecting association via the putative salt bridge. Finally, we find that the N and proximal segment of the C tail move towards the plasma membrane upon acidification, while we detect no substantial lateral movement (Figure 6). Our results support the emerging idea that extracellular acidification promotes ASIC ICD conformational changes, potentially creating or exposing sites within the membrane proximal segments that bind intracellular signaling partners and facilitating metabotropic signaling.

### *Sources of error*

The principle source of error is the possible disruption of the N or C tail caused by the addition or insertion of a fluorescent protein. Future studies could employ smaller fluorophores such as the fluorescent non-canonical amino acid L-ANAP<sup>54-56</sup> or split inteins and semi synthesis<sup>57-59</sup> to introduce small, bright fluorophores in specific sites. Such methods, ideally combined with acceptor groups<sup>54-56</sup>, will refine and test the provisional map we report here. An additional source of error in our DPA quenching estimates is the background fluorescence from FPs in the ER. These FPs may be either unquenched or progressively quenched over the course of the experiment as DPA migrates into the cell. In prior work, intracellular channels and FPs produced variable amounts of background fluorescence<sup>35,48,50</sup>, which may confound more accurate mapping. Fortunately, our family of cASIC1 with FP insertions show very robust plasma

membrane expression (Supplemental Figure 4). We also selected cells with minimal intracellular fluorescence to reduce the impact of this background signal. A further source of potential error is the orientation dependence of FRET. This concern is partly mitigated since the fluorophores is attached to regions which are likely to be unstructured or highly flexible, allowing the FPs to adopt multiple orientations. Consistent with this, past theoretical and experimental work suggests a minimal influence of orientation dependence for FRET involving DPA as an acceptor<sup>35</sup>. Subsequent studies using isotropic resonance transfer methods such as tmFRET or LRET may reduce many of these concerns and provide a more refined map.

### *Structural interpretation*

Structures of full-length cASIC1 have been solved using cryo-EM. The N and C tails are present in these constructs yet give no resolvable density<sup>24,25</sup>. This suggests the tails maybe largely disordered, waiting to bind intracellular proteins via an induced fit or conformation selection mechanisms<sup>60,61</sup>. If true, then our data define the borders of the conformation landscape these disordered segments occupy. However, it is also possible that within these disordered tails are areas of secondary structure. A small but well-ordered segment of the tails which is moved around by adjacent disordered regions might be unresolvable by cryo-EM. Having isolated regions of order amongst a largely disordered tail is consistent with the proposed salt bridge between N and the C1 region. Secondary structure predictions also support this view, with the proximal segment of the C tail having a strong tendency to form alpha helices while the remainder of the tail is unstructured. Additional approaches such as CD spectroscopy combined with molecular modelling<sup>62</sup>, NMR and DEER will be critical to address the extent and location of secondary structure within the tails as well as further define the intracellular structural changes induced by extracellular pH that we report here. A particularly useful approach maybe smFRET,

which has already been used to gain insight into the unstructured, and larger, intracellular tails of NMDA receptors<sup>63,64</sup>.

### *Physiological relevance*

Numerous protein-protein interactions have been reported for ASICs that are important for channel trafficking, gating, and possibly metabotropic signaling<sup>34,65</sup>. The best documented of these are PICK1, PSD-95 and stomatin<sup>29-31,33,66-68</sup>. Of particular note, is the interaction between ASIC3's C tail and stomatin, which enables stomatin to inhibit channel activation through a mechanism involving the first transmembrane helix<sup>31</sup>. In addition, recent work has suggested that the membrane proximal region of the ASIC1 C tail becomes liberated from the N-tail during desensitization, allowing for the recruitment of RIP1 kinase<sup>17</sup>. This results in activation of RIP1 by phosphorylation leading to eventual cell death via necroptosis. Canonical activation of RIP1 by the tumor necrosis factor (TNF) receptor 1 (TNFR1) occurs through heterodimerization of death domains (DD) present on both RIP1 and TNFR1<sup>69</sup>. ASIC1 does not contain a death domain, so how RIP1 interacts with the C-tail of ASIC1 and resulting in activation remains an important unanswered question. Using the FP insertion approach we adopted is problematic for investigating this, or any of the other protein-protein interactions mentioned above, due to the sheer disruptive size of the FP. However, using a higher resolution method with a smaller fluorophore could shed light on the molecular determinants, timing and dynamics of these interactions. Thus the future of investigating the ASIC ICDs will be bright.

## 477 References

- 478 1 Pattison, L. A., Callejo, G. & St John Smith, E. Evolution of acid nociception: ion channels and  
479 receptors for detecting acid. *Philosophical transactions of the Royal Society of London. Series*  
480 *B, Biological sciences* **374**, 20190291, doi:10.1098/rstb.2019.0291 (2019).
- 481 2 Du, J. *et al.* Protons are a neurotransmitter that regulates synaptic plasticity in the lateral  
482 amygdala. *Proc Natl Acad Sci U S A* **111**, 8961-8966, doi:10.1073/pnas.1407018111 (2014).
- 483 3 Kreple, C. J. *et al.* Acid-sensing ion channels contribute to synaptic transmission and inhibit  
484 cocaine-evoked plasticity. *Nat Neurosci* **17**, 1083-1091, doi:10.1038/nn.3750 (2014).
- 485 4 Yu, Z. *et al.* The acid-sensing ion channel ASIC1a mediates striatal synapse remodeling and  
486 procedural motor learning. *Sci Signal* **11**, doi:10.1126/scisignal.aar4481 (2018).
- 487 5 Liu, M. G. *et al.* Acid-sensing ion channel 1a contributes to hippocampal LTP inducibility through  
488 multiple mechanisms. *Scientific reports* **6**, 23350, doi:10.1038/srep23350 (2016).
- 489 6 Uchitel, O. D., Gonzalez Inchauspe, C. & Weissmann, C. Synaptic signals mediated by protons  
490 and acid-sensing ion channels. *Synapse* **73**, e22120, doi:10.1002/syn.22120 (2019).
- 491 7 Du, J. *et al.* Transient acidosis while retrieving a fear-related memory enhances its lability. *Elife*  
492 **6**, doi:10.7554/eLife.22564 (2017).
- 493 8 Taugher, R. J. *et al.* The amygdala differentially regulates defensive behaviors evoked by CO<sub>2</sub>.  
494 *Behav Brain Res* **377**, 112236, doi:10.1016/j.bbr.2019.112236 (2020).
- 495 9 Taugher, R. J. *et al.* ASIC1A in neurons is critical for fear-related behaviors. *Genes Brain Behav*  
496 **16**, 745-755, doi:10.1111/gbb.12398 (2017).
- 497 10 Taugher, R. J. *et al.* The bed nucleus of the stria terminalis is critical for anxiety-related behavior  
498 evoked by CO<sub>2</sub> and acidosis. *J Neurosci* **34**, 10247-10255, doi:10.1523/JNEUROSCI.1680-  
499 14.2014 (2014).
- 500 11 Ziemann, A. E. *et al.* Seizure termination by acidosis depends on ASIC1a. *Nat Neurosci* **11**,  
501 816-822, doi:10.1038/nn.2132 (2008).
- 502 12 Xiong, Z. G. *et al.* Neuroprotection in ischemia: blocking calcium-permeable acid-sensing ion  
503 channels. *Cell* **118**, 687-698, doi:10.1016/j.cell.2004.08.026 (2004).
- 504 13 Wemmie, J. A., Taugher, R. J. & Kreple, C. J. Acid-sensing ion channels in pain and disease.  
505 *Nat Rev Neurosci* **14**, 461-471, doi:10.1038/nrn3529 (2013).
- 506 14 Grunder, S. & Pusch, M. Biophysical properties of acid-sensing ion channels (ASICs).  
507 *Neuropharmacology* **94**, 9-18, doi:10.1016/j.neuropharm.2014.12.016 (2015).
- 508 15 Benson, C. J. *et al.* Heteromultimers of DEG/ENaC subunits form H<sup>+</sup>-gated channels in mouse  
509 sensory neurons. *Proc Natl Acad Sci U S A* **99**, 2338-2343, doi:10.1073/pnas.032678399  
510 (2002).
- 511 16 Ruan, Z., Osei-Owusu, J., Du, J., Qiu, Z. & Lu, W. Structures and pH-sensing mechanism of the  
512 proton-activated chloride channel. *Nature* **588**, 350-354, doi:10.1038/s41586-020-2875-7  
513 (2020).
- 514 17 Wang, J. J. *et al.* Disruption of auto-inhibition underlies conformational signaling of ASIC1a to  
515 induce neuronal necroptosis. *Nature communications* **11**, 475, doi:10.1038/s41467-019-13873-0  
516 (2020).
- 517 18 Wang, Y.-Z. *et al.* Tissue acidosis induces neuronal necroptosis via ASIC1a channel  
518 independent of its ionic conduction. *eLife* **4**, e05682, doi:10.7554/eLife.05682 (2015).
- 519 19 Rodriguez-Moreno, A. & Sihra, T. S. Kainate receptors with a metabotropic *modus operandi*.  
520 *Trends Neurosci* **30**, 630-637, doi:10.1016/j.tins.2007.10.001 (2007).
- 521 20 Dore, K. *et al.* Unconventional NMDA Receptor Signaling. *J Neurosci* **37**, 10800-10807,  
522 doi:10.1523/JNEUROSCI.1825-17.2017 (2017).
- 523 21 Kabbani, N. & Nichols, R. A. Beyond the Channel: Metabotropic Signaling by Nicotinic  
524 Receptors. *Trends Pharmacol Sci* **39**, 354-366, doi:10.1016/j.tips.2018.01.002 (2018).
- 525 22 Valbuena, S. & Lerma, J. Non-canonical Signaling, the Hidden Life of Ligand-Gated Ion  
526 Channels. *Neuron* **92**, 316-329, doi:10.1016/j.neuron.2016.10.016 (2016).

527 23 Pressey, J. C. & Woodin, M. A. Kainate receptor regulation of synaptic inhibition in the  
528 hippocampus. *J Physiol* **599**, 485-492, doi:10.1113/JP279645 (2021).

529 24 Yoder, N. & Gouaux, E. The His-Gly motif of acid-sensing ion channels resides in a reentrant  
530 'loop' implicated in gating and ion selectivity. *Elife* **9**, doi:10.7554/eLife.56527 (2020).

531 25 Yoder, N., Yoshioka, C. & Gouaux, E. Gating mechanisms of acid-sensing ion channels. *Nature*  
532 **555**, 397, doi:10.1038/nature25782 (2018).

533 26 Bacongus, I., Bohlen, C. J., Goehring, A., Julius, D. & Gouaux, E. X-ray structure of acid-  
534 sensing ion channel 1-snake toxin complex reveals open state of a Na(+)-selective channel.  
535 *Cell* **156**, 717-729, doi:10.1016/j.cell.2014.01.011 (2014).

536 27 Gonzales, E. B., Kawate, T. & Gouaux, E. Pore architecture and ion sites in acid-sensing ion  
537 channels and P2X receptors. *Nature* **460**, 599, doi:10.1038/nature08218 (2009).

538 28 Chai, S. *et al.* A kinase-anchoring protein 150 and calcineurin are involved in regulation of acid-  
539 sensing ion channels ASIC1a and ASIC2a. *J Biol Chem* **282**, 22668-22677,  
540 doi:10.1074/jbc.M703624200 (2007).

541 29 Baron, A. *et al.* Protein kinase C stimulates the acid-sensing ion channel ASIC2a via the PDZ  
542 domain-containing protein PICK1. *J Biol Chem* **277**, 50463-50468, doi:10.1074/jbc.M208848200  
543 (2002).

544 30 Hruska-Hageman, A. M., Benson, C. J., Leonard, A. S., Price, M. P. & Welsh, M. J. PSD-95 and  
545 Lin-7b interact with acid-sensing ion channel-3 and have opposite effects on H<sup>+</sup>- gated current.  
546 *J Biol Chem* **279**, 46962-46968, doi:10.1074/jbc.M405874200 (2004).

547 31 Klipp, R. C., Cullinan, M. M. & Bankston, J. R. Insights into the molecular mechanisms  
548 underlying the inhibition of acid-sensing ion channel 3 gating by stomatin. *The Journal of*  
549 *general physiology* **152**, doi:10.1085/jgp.201912471 (2020).

550 32 Schnitzler, M. K. *et al.* The cytoskeletal protein alpha-actinin regulates acid-sensing ion channel  
551 1a through a C-terminal interaction. *J Biol Chem* **284**, 2697-2705, doi:10.1074/jbc.M805110200  
552 (2009).

553 33 Leonard, A. S. *et al.* cAMP-dependent protein kinase phosphorylation of the acid-sensing ion  
554 channel-1 regulates its binding to the protein interacting with C-kinase-1. *Proc Natl Acad Sci U*  
555 *S A* **100**, 2029-2034, doi:10.1073/pnas.252782799 (2003).

556 34 Kellenberger, S. & Schild, L. International union of basic and clinical pharmacology. XCI.  
557 structure, function, and pharmacology of acid-sensing ion channels and the epithelial Na<sup>+</sup>-  
558 channel. *Pharmacological reviews* **67**, 1-35, doi:10.1124/pr.114.009225 (2015).

559 35 Zachariassen, L. G. *et al.* Structural rearrangement of the intracellular domains during AMPA  
560 receptor activation. *Proc Natl Acad Sci U S A* **113**, E3950-3959, doi:10.1073/pnas.1601747113  
561 (2016).

562 36 Rook, M. L., Williamson, A., Lueck, J. D., Musgaard, M. & Maclean, D. M. beta11-12 linker  
563 isomerization governs Acid-sensing ion channel desensitization and recovery. *Elife* **9**,  
564 doi:10.7554/eLife.51111 (2020).

565 37 Rook, M. L. *et al.* Mutation of a conserved Gln residue does not abolish desensitization of acid-  
566 sensing ion channel 1. *bioRxiv*, 2020.2012.2019.423606, doi:10.1101/2020.12.19.423606  
567 (2020).

568 38 MacLean, D. M. in *Ionotropic Glutamate Receptor Technologies* (ed G. K. Popescu) Ch. 12,  
569 165-183 (Springer, 2015).

570 39 McCulloch, T. W., MacLean, D. M. & Kammermeier, P. J. Comparing the performance of  
571 mScarlet-I, mRuby3, and mCherry as FRET acceptors for mNeonGreen. *PloS one* **15**,  
572 e0219886, doi:10.1371/journal.pone.0219886 (2020).

573 40 Goedhart, J. *et al.* Structure-guided evolution of cyan fluorescent proteins towards a quantum  
574 yield of 93%. *Nature communications* **3**, 751, doi:10.1038/ncomms1738 (2012).

575 41 Wang, D., Zhang, Z., Chanda, B. & Jackson, M. B. Improved probes for hybrid voltage sensor  
576 imaging. *Biophysical journal* **99**, 2355-2365, doi:10.1016/j.bpj.2010.07.037 (2010).



577 42 Lambert, T. J. FPbase: a community-editable fluorescent protein database. *Nature methods* **16**,  
578 277-278, doi:10.1038/s41592-019-0352-8 (2019).

579 43 Gunupuru, R., Kesharwani, M. K., Chakraborty, A., Ganguly, B. & Paul, P. Dipicrylamine as a  
580 colorimetric sensor for anions: experimental and computational study. *RSC Adv.* **4**, 53273-  
581 53281, doi:10.1039/c4ra09099c (2014).

582 44 Miller, W. G. & Goebel, C. V. Dimensions of protein random coils. *Biochemistry* **7**, 3925-3935,  
583 doi:10.1021/bi00851a021 (1968).

584 45 Chanda, B. *et al.* A hybrid approach to measuring electrical activity in genetically specified  
585 neurons. *Nat Neurosci* **8**, 1619-1626, doi:10.1038/nn1558 (2005).

586 46 Chanda, B., Asamoah, O. K., Blunck, R., Roux, B. & Bezanilla, F. Gating charge displacement  
587 in voltage-gated ion channels involves limited transmembrane movement. *Nature* **436**, 852-856,  
588 doi:10.1038/nature03888 (2005).

589 47 Groulx, N., Juteau, M. & Blunck, R. Rapid topology probing using fluorescence spectroscopy in  
590 planar lipid bilayer: the pore-forming mechanism of the toxin Cry1Aa of *Bacillus thuringiensis*.  
591 *The Journal of general physiology* **136**, 497-513, doi:10.1085/jgp.200910347 (2010).

592 48 Barros, F., Dominguez, P. & de la Pena, P. Relative positioning of Kv11.1 (hERG) K(+) channel  
593 cytoplasmic domain-located fluorescent tags toward the plasma membrane. *Scientific reports* **8**,  
594 15494, doi:10.1038/s41598-018-33492-x (2018).

595 49 Taraska, J. W. & Zagotta, W. N. Structural dynamics in the gating ring of cyclic nucleotide-gated  
596 ion channels. *Nature structural & molecular biology* **14**, 854-860, doi:10.1038/nsmb1281 (2007).

597 50 De-la-Rosa, V., Rangel-Yescas, G. E., Ladron-de-Guevara, E., Rosenbaum, T. & Islas, L. D.  
598 Coarse architecture of the transient receptor potential vanilloid 1 (TRPV1) ion channel  
599 determined by fluorescence resonance energy transfer. *J Biol Chem* **288**, 29506-29517,  
600 doi:10.1074/jbc.M113.479618 (2013).

601 51 Ben-Johny, M., Yue, D. N. & Yue, D. T. Detecting stoichiometry of macromolecular complexes  
602 in live cells using FRET. *Nature communications* **7**, 13709, doi:10.1038/ncomms13709 (2016).

603 52 Shinoda, H. *et al.* Acid-Tolerant Monomeric GFP from *Olindias formosa*. *Cell Chem Biol* **25**,  
604 330-338 e337, doi:10.1016/j.chembiol.2017.12.005 (2018).

605 53 Merzlyak, E. M. *et al.* Bright monomeric red fluorescent protein with an extended fluorescence  
606 lifetime. *Nature methods* **4**, 555-557, doi:10.1038/nmeth1062 (2007).

607 54 Zagotta, W. N., Gordon, M. T., Senning, E. N., Munari, M. A. & Gordon, S. E. Measuring  
608 distances between TRPV1 and the plasma membrane using a noncanonical amino acid and  
609 transition metal ion FRET. *The Journal of general physiology* **147**, 201-216,  
610 doi:10.1085/jgp.201511531 (2016).

611 55 Gordon, S. E., Senning, E. N., Aman, T. K. & Zagotta, W. N. Transition metal ion FRET to  
612 measure short-range distances at the intracellular surface of the plasma membrane. *The*  
613 *Journal of general physiology* **147**, 189-200, doi:10.1085/jgp.201511530 (2016).

614 56 Gordon, S. E., Munari, M. & Zagotta, W. N. Visualizing conformational dynamics of proteins in  
615 solution and at the cell membrane. *Elife* **7**, doi:10.7554/eLife.37248 (2018).

616 57 Khoo, K. K. *et al.* Chemical modification of proteins by insertion of synthetic peptides using  
617 tandem protein trans-splicing. *Nature communications* **11**, 2284, doi:10.1038/s41467-020-  
618 16208-6 (2020).

619 58 Lueck, J. D. *et al.* Atomic mutagenesis in ion channels with engineered stoichiometry. *Elife* **5**,  
620 doi:10.7554/eLife.18976 (2016).

621 59 Shah, N. H. & Muir, T. W. Inteins: Nature's Gift to Protein Chemists. *Chemical science* **5**, 446-  
622 461, doi:10.1039/c3sc52951g (2014).

623 60 Arai, M., Sugase, K., Dyson, H. J. & Wright, P. E. Conformational propensities of intrinsically  
624 disordered proteins influence the mechanism of binding and folding. *Proc Natl Acad Sci U S A*  
625 **112**, 9614-9619, doi:10.1073/pnas.1512799112 (2015).

- 61 Oldfield, C. J. & Dunker, A. K. Intrinsically disordered proteins and intrinsically disordered protein regions. *Annu Rev Biochem* **83**, 553-584, doi:10.1146/annurev-biochem-072711-164947 (2014).
- 62 Ezerski, J. C., Zhang, P., Jennings, N. C., Waxham, M. N. & Cheung, M. S. Molecular Dynamics Ensemble Refinement of Intrinsically Disordered Peptides According to Deconvoluted Spectra from Circular Dichroism. *Biophysical journal* **118**, 1665-1678, doi:10.1016/j.bpj.2020.02.015 (2020).
- 63 Choi, U. B. *et al.* Modulating the intrinsic disorder in the cytoplasmic domain alters the biological activity of the N-methyl-D-aspartate-sensitive glutamate receptor. *J Biol Chem* **288**, 22506-22515, doi:10.1074/jbc.M113.477810 (2013).
- 64 Choi, U. B., Xiao, S., Wollmuth, L. P. & Bowen, M. E. Effect of Src kinase phosphorylation on disordered C-terminal domain of N-methyl-D-aspartic acid (NMDA) receptor subunit GluN2B protein. *J Biol Chem* **286**, 29904-29912, doi:10.1074/jbc.M111.258897 (2011).
- 65 Zeng, W. Z., Liu, D. S. & Xu, T. L. Acid-sensing ion channels: trafficking and pathophysiology. *Channels (Austin)* **8**, 481-487, doi:10.4161/19336950.2014.958382 (2014).
- 66 Hruska-Hageman, A. M., Wemmie, J. A., Price, M. P. & Welsh, M. J. Interaction of the synaptic protein PICK1 (protein interacting with C kinase 1) with the non-voltage gated sodium channels BNC1 (brain Na<sup>+</sup> channel 1) and ASIC (acid-sensing ion channel). *Biochem J* **361**, 443-450, doi:10.1042/0264-6021:3610443 (2002).
- 67 Zha, X. M. *et al.* ASIC2 subunits target acid-sensing ion channels to the synapse via an association with PSD-95. *J Neurosci* **29**, 8438-8446, doi:10.1523/JNEUROSCI.1284-09.2009 (2009).
- 68 Price, M. P., Thompson, R. J., Eshcol, J. O., Wemmie, J. A. & Benson, C. J. Stomatin modulates gating of acid-sensing ion channels. *J Biol Chem* **279**, 53886-53891, doi:10.1074/jbc.M407708200 (2004).
- 69 Meng, H. *et al.* Death-domain dimerization-mediated activation of RIPK1 controls necroptosis and RIPK1-dependent apoptosis. *Proceedings of the National Academy of Sciences* **115**, E2001-E2009, doi:10.1073/pnas.1722013115 (2018).



## Supplemental Figures

### Supplemental Figure 1

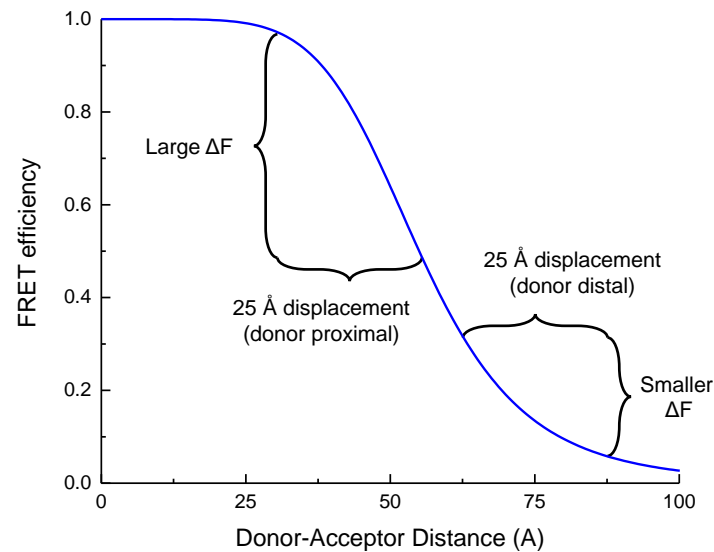

**Supplemental Figure 1: Non-linearity of FRET provides for distance estimates.** Simulated FRET efficiency over distance with an  $R_0$  of 55 angstroms. Moving donor and acceptor apart by a fixed distance has a larger effect when the donor and acceptor are close (donor proximal case) compared to when they are further apart (donor distal case).

## Supplemental Figure 2

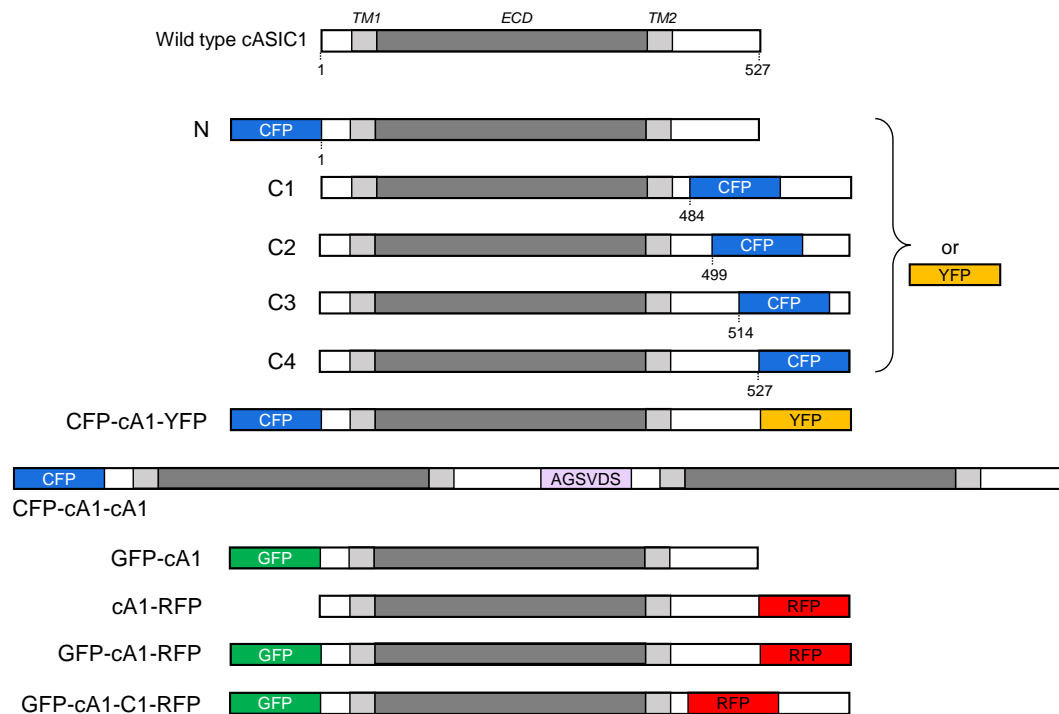

**Supplemental Figure 2: cASIC1 constructs used in this study.** The extracellular domain (*ECD*) and transmembrane helices (*TM*) are grey with amino and carboxy termini depicted in white. Numbers indicate the amino acid position for insertion. The violet bar shows the amino acid linker between the first and second subunit in the cASIC1 dimer. CFP, YFP, GFP and RFP represent mTurq2, mVenus, Gamillus and tagRFP, respectively. See *Methods* for further details.

# Supplemental Figure 3

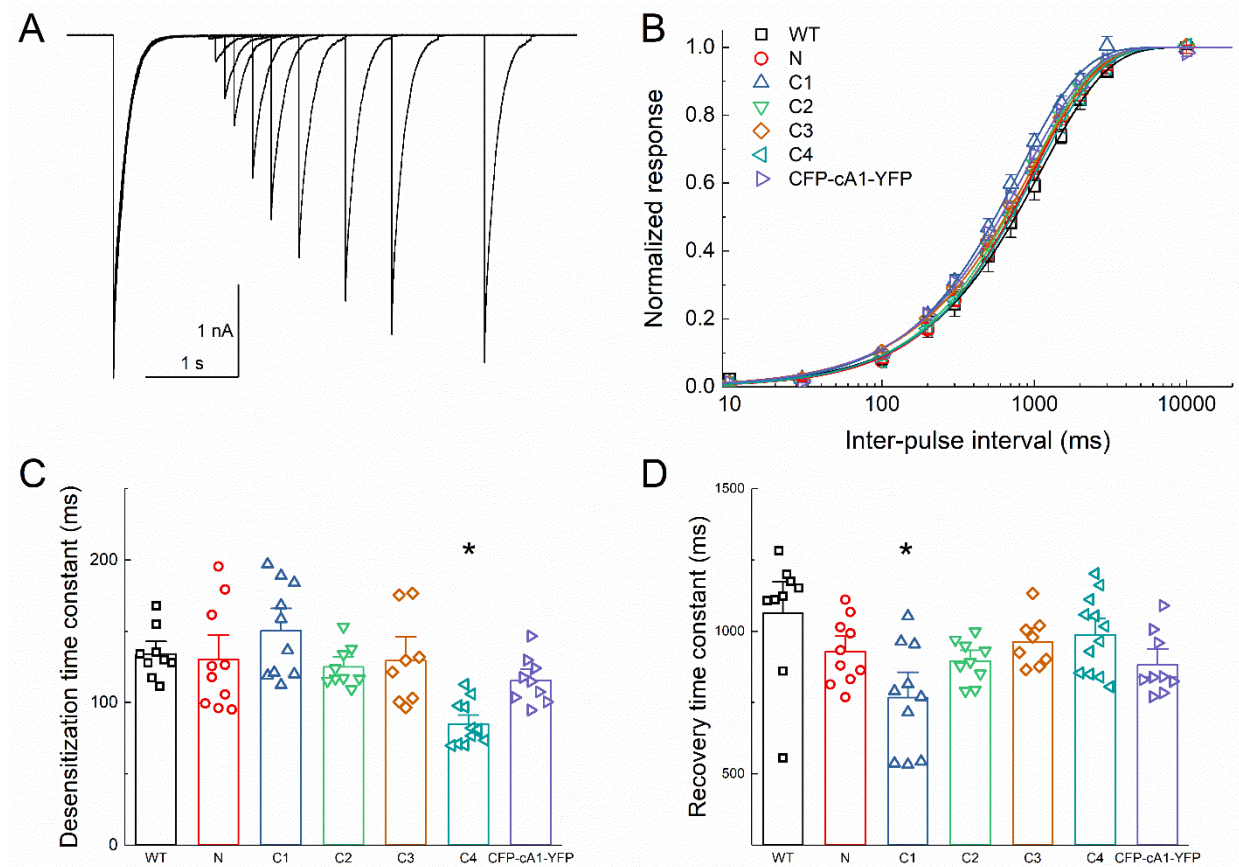

## Supplemental Figure 3: FP insertion does not substantially alter desensitization kinetics.

(A) Outside-out patch recording of cASIC1 CFP at C3 during paired pulse stimulation protocol using pH 8 and pH 5. (B) Recovery from desensitization curves over various inter-pulse intervals for the indicated constructs. (C & D) Summary of desensitization entry (C) and recovery (D) time constants for the indicated constructs. Symbols denote individual excised patches (N = 9 – 12 patches per construct). Asterisks indicate significant difference compared to wild type using randomization test. For C4 desensitization,  $p = 0.025$ . For C1 recovery,  $p = 0.0073$ . Error bars represent SEM in all panels.

# Supplemental Figure 4

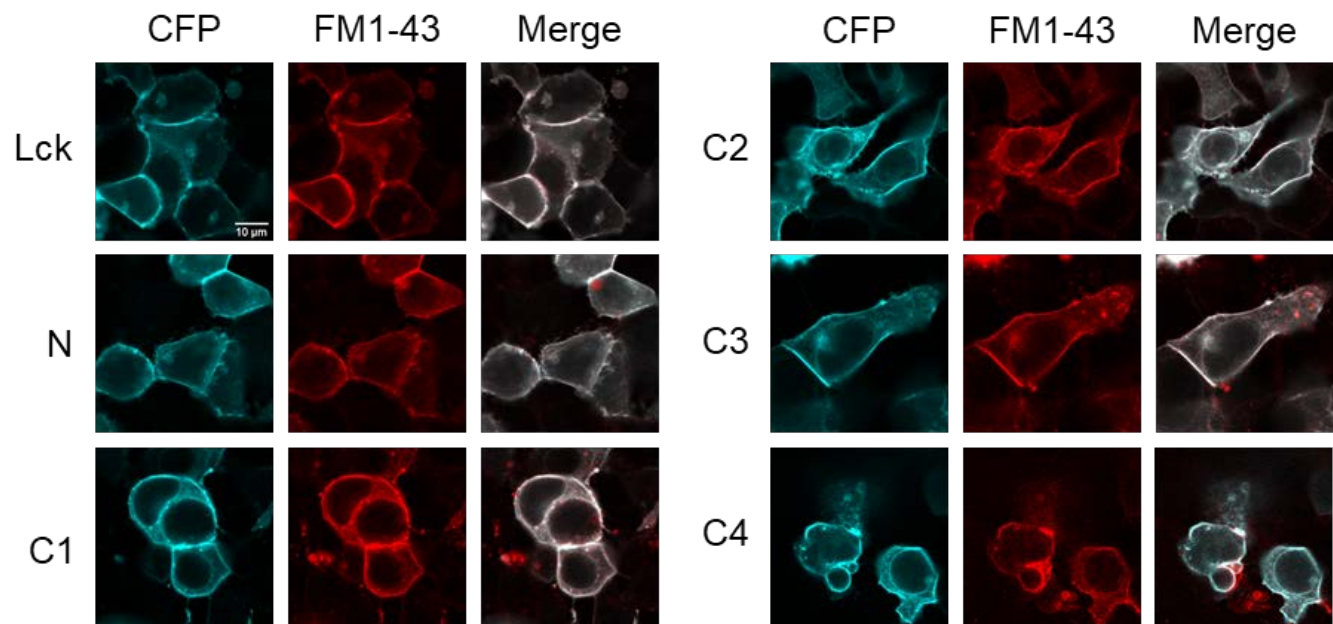

**Supplemental Figure 4: Lck-CFP and CFP-tagged cASIC1 constructs localize to the plasma membrane.** Confocal images of HEK293T cells transfected with the indicated constructs two days prior. Plasma membrane was stained with FM1-43 (5 μM) immediately prior to imaging.

## Supplemental Figure 5

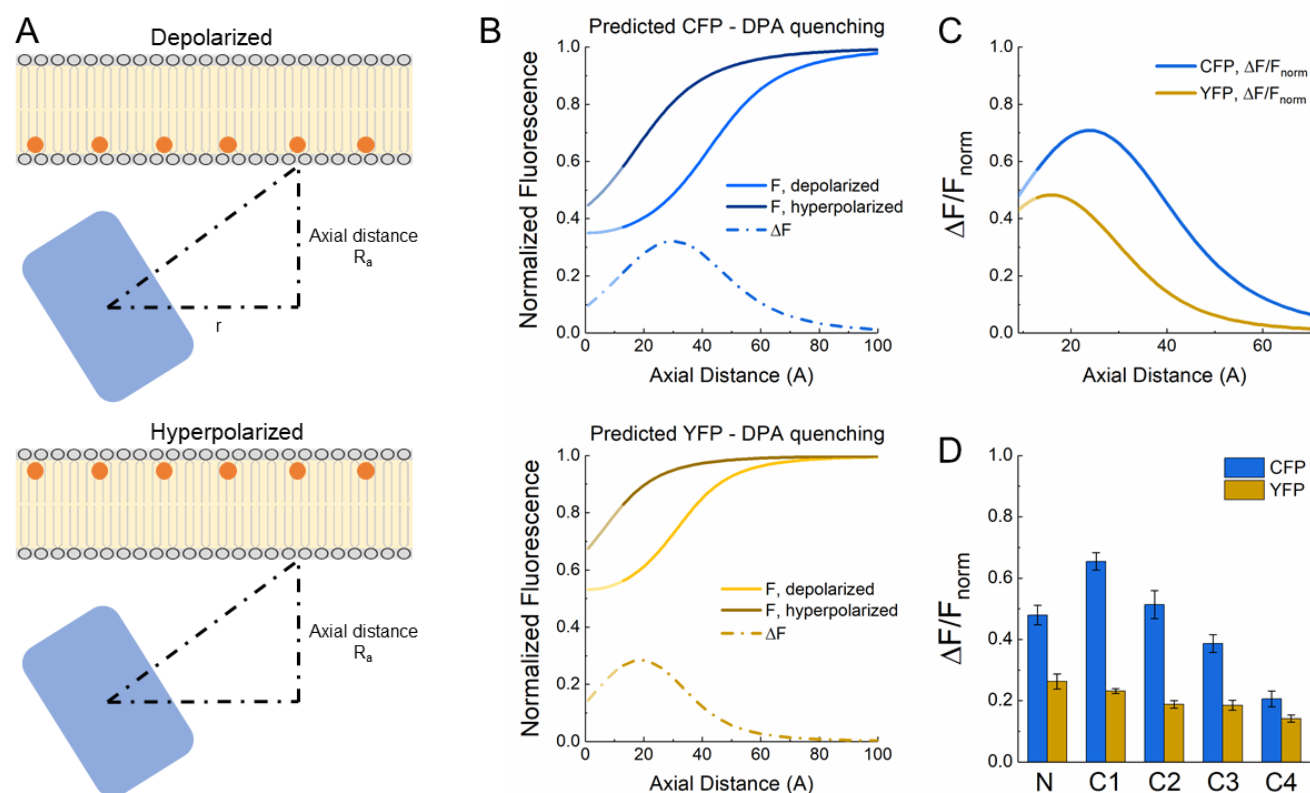

**Supplemental Figure 5: Theoretical analysis of FP-DPA quenching.** (A) Schematic of DPA quenching of a fluorophore positioned away from the plasma membrane. (B) Predicted quenching curves for CFP (upper) and YFP (lower) at depolarized (light color) or hyperpolarized (darker color) voltages. Dotted line depicts the difference between hyperpolarized and depolarized curves or  $\Delta F$  as a function of axial distance. (C)  $\Delta F$  versus distance curves normalized to fluorescence at hyperpolarized voltage or  $\Delta F/F_{\text{norm}}$  as a function of distance. (D) Plot of observed quenching (ie.  $\Delta F/F_{\text{norm}}$ ) for each FP insertion. Same data as in Figure 2D. Note similarity with predicted  $\Delta F/F_{\text{norm}}$  curves in panel C.

## Supplemental Figure 6

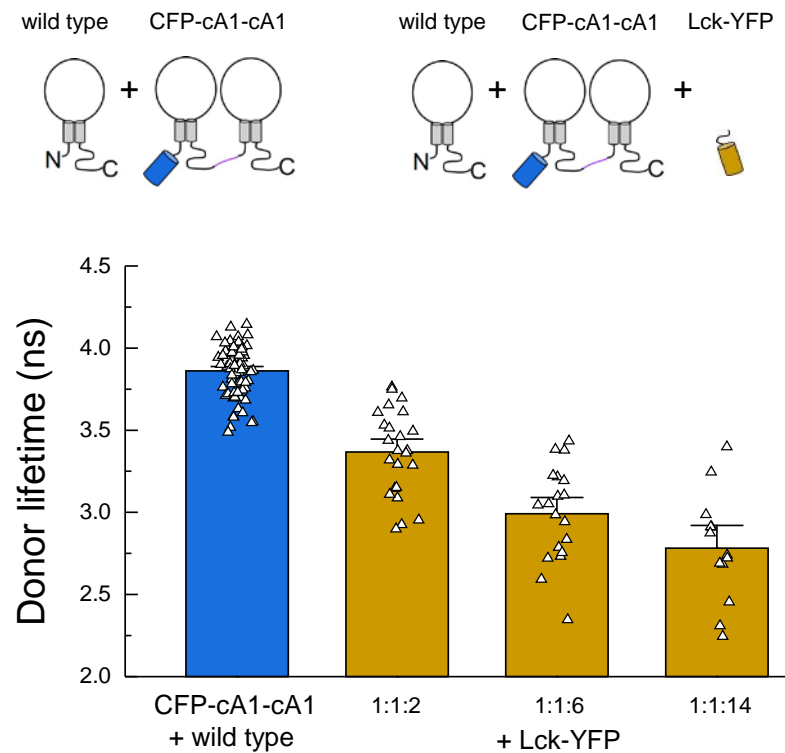

**Supplemental Figure 6: FRET due to membrane ‘crowding’.** Cartoon (*upper*) and lifetimes (*lower*) from the indicated constructs for measuring FRET between cASIC dimer and membrane tethered YFP (Lck-YFP) over varying cDNA ratios. Symbols denote single cells (N = 13 – 74 cells per construct) and error bars are SEM

## Supplemental Figure 7

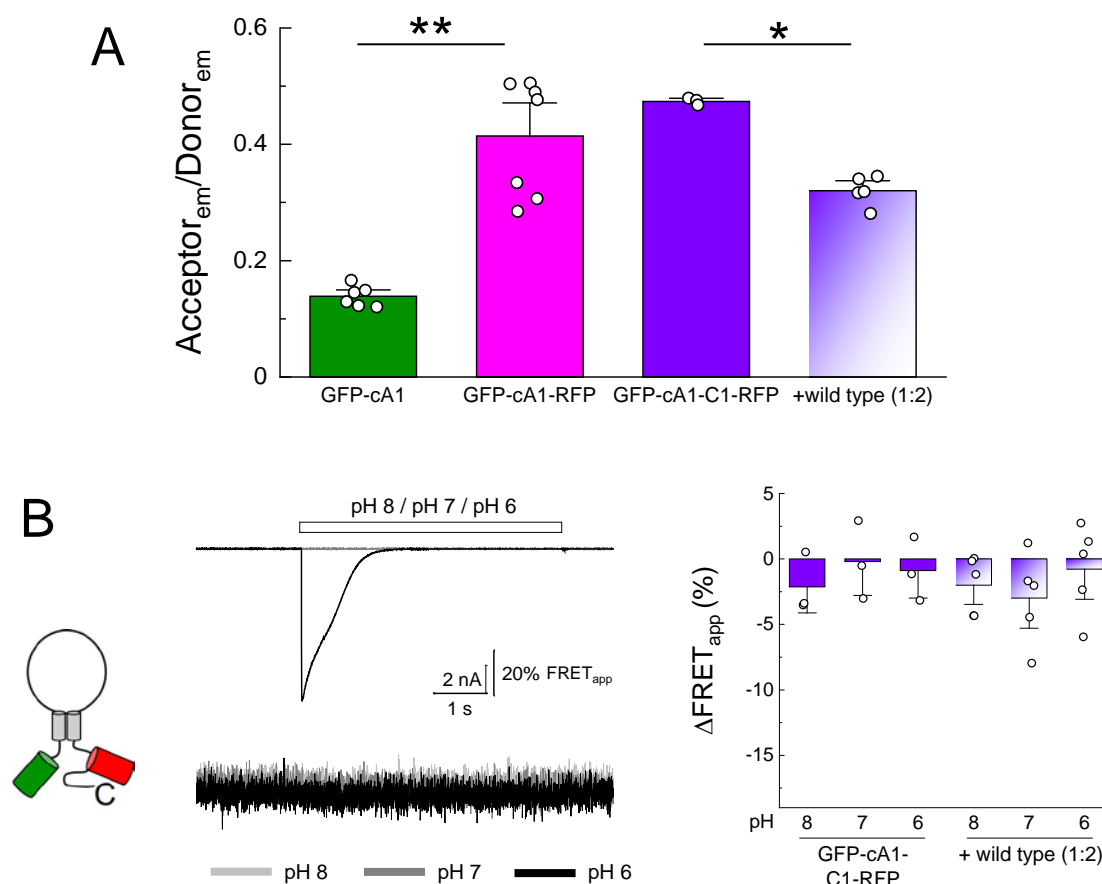

**Supplemental Figure 7: N and C terminal GFP and RFP do not change FRET efficiency upon extracellular acidification. (A)** Summary of green fluorescence emission divided by red fluorescence emission upon GFP excitation for the indicated clones. \*\* denotes  $p = 0.0007$ , \* indicates  $p = 0.0121$  by randomization test. **(B)** Cartoon (*left*), example traces of current and fluorescence ratio (*middle*) and summary changes to apparent FRET (*right*) from the indicated. Symbols denote single cells ( $N = 3 - 7$  cells per construct) and error bars are SEM.



# Supplemental Figure 8

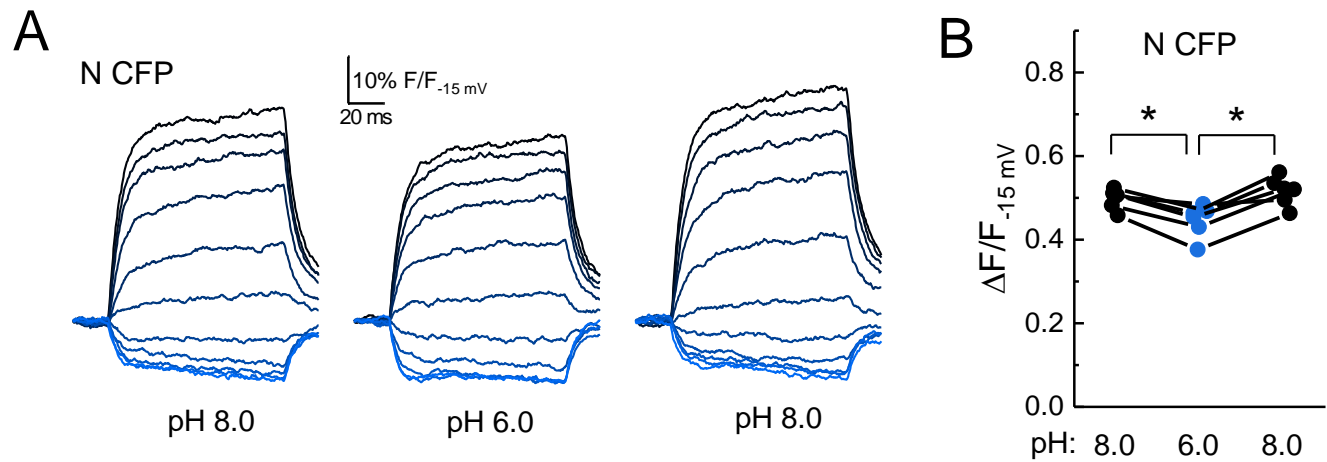

**Supplemental Figure 8: Extracellular acidification-induced motion of N CFP is readily reversible. (A)** Fluorescence-voltage traces from single cell expressing N CFP in the indicated extracellular buffer with 5  $\mu\text{M}$  DPA. **(B)** Summary of the voltage-dependent extent of DPA quenching from N CFP in the indicated extracellular pH. Symbols denote individual cells ( $N = 5$ ) and error bars represent SEM. \* indicates  $p$  value  $< 0.05$  by Wilcoxon rank sum test.
